# Supplementary material
Source: Springer Nature journal article supplement (https://www.springermedizin.de/resource/supplementary/12889_2010_3026_MOESM5_ESM.pdf/9487790)

**3a. 'Non-adopters' (Group 1)**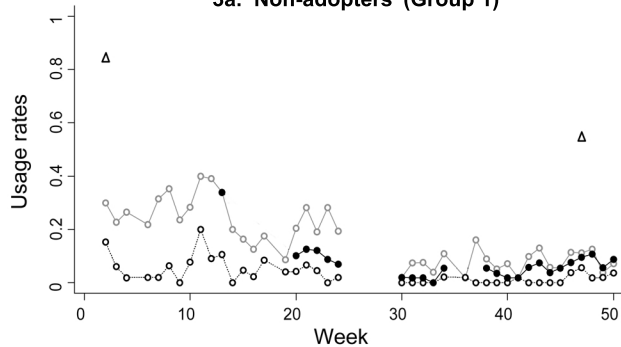**3b. 'Minimal-adopters' (Group 2)**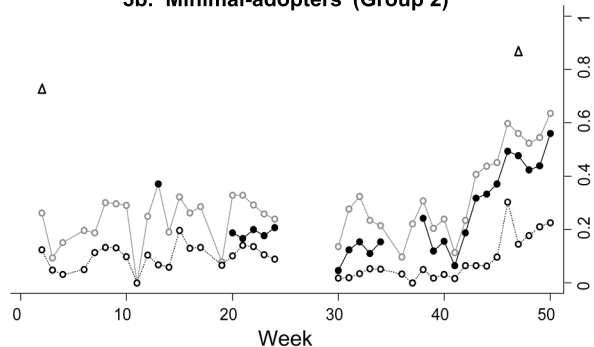**3c. 'Declining-adopters' (Group 3)**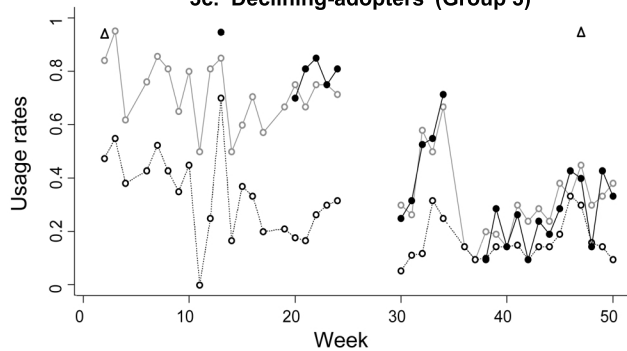**3d. 'Emerging-adopters' (Group 4)**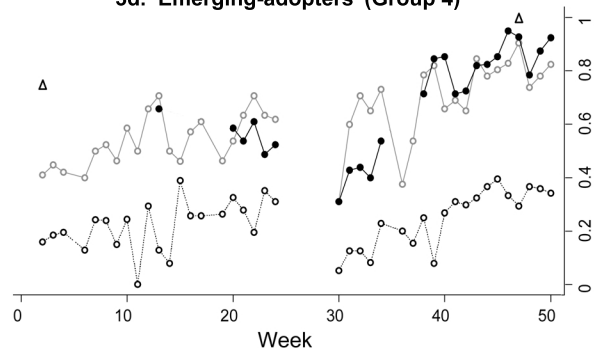

Supplement: MOESM5 [file 9487790]
